# Supplementary material for: Prevalence of atrophic gastritis in southwest China and predictive strength of serum gastrin-17: A cross-sectional study (SIGES)
Source: PubMed Central journal article supplement (PMC7066171; doi:10.1038/s41598-020-61472-7), 2020-03-11
Supplement: 41598_2020_61472_MOESM2_ESM.pdf [file 41598_2020_61472_MOESM2_ESM.pdf]

# **Prevalence of atrophic gastritis in southwest China and predictive strength of serum gastrin-17: A cross-sectional study (SIGES)**

**Authors:** Rui Wang;<sup>1</sup> Xin-Zu Chen<sup>2,3,4</sup>; on the behalf of the SIGES research group

## **Affiliations:**

1. Department of Gastroenterology, Nursing Section, West China Hospital, Sichuan University, Chengdu, China.
2. Department of Gastrointestinal Surgery & Laboratory of Gastric Cancer, West China Hospital, Sichuan University, Chengdu, China.
3. Department of Gastrointestinal and Hernia Surgery, the Second People's Hospital of Yibin City · West China Yibin Hospital, Sichuan University, Yibin, China.
4. Department of General Surgery, the First People's Hospital of Longquanyi District · West China Longquan Hospital, Sichuan University, Chengdu, China.

## **Correspondence:**

Xin-Zu Chen, Department of Gastrointestinal Surgery, West China Hospital, Sichuan University, Guo Xue Xiang 37, Chengdu 610041, Sichuan, China. Email:

chenxinzu@scu.edu.cn

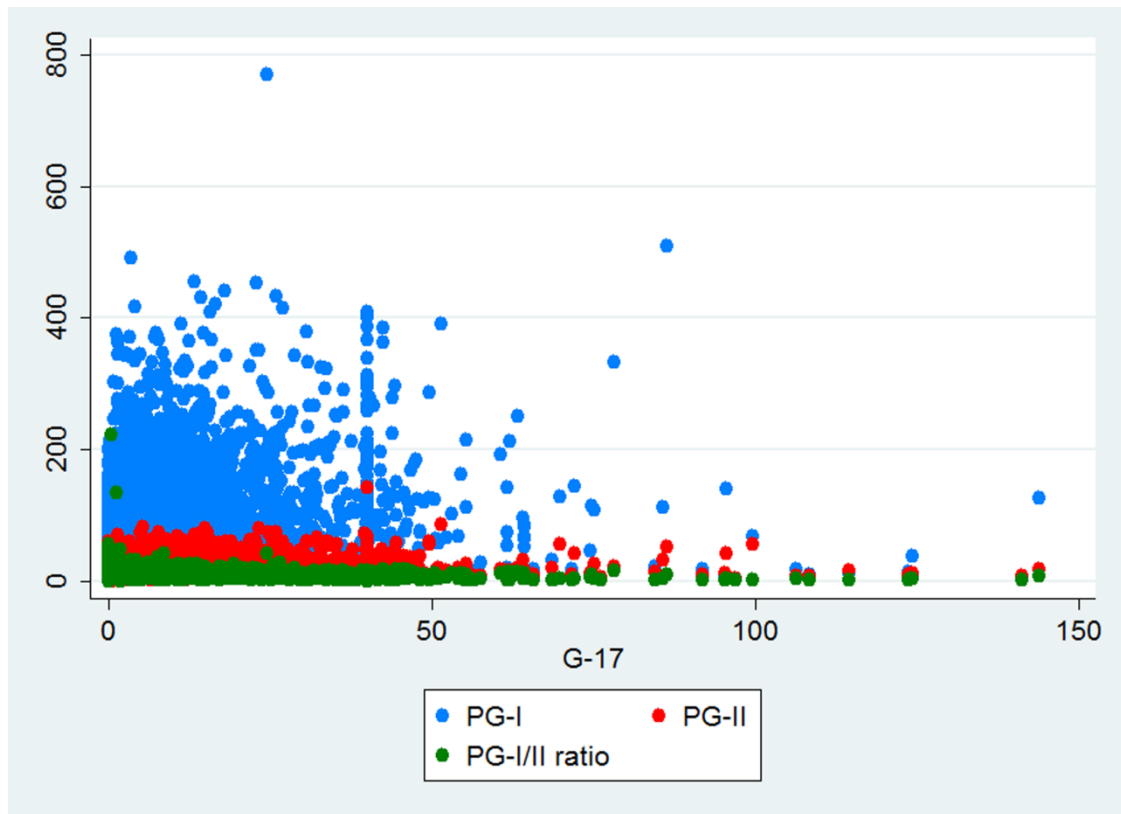

|                   | PG-I        |        | PG-II       |        | PG-I/II ratio |        |
|-------------------|-------------|--------|-------------|--------|---------------|--------|
|                   | Coefficient | p      | Coefficient | p      | Coefficient   | p      |
| <b>Both sexes</b> | 0.29        | <0.001 | 0.50        | <0.001 | -0.44         | <0.001 |
| <b>Males</b>      | 0.28        | <0.001 | 0.50        | <0.001 | -0.44         | <0.001 |
| <b>Females</b>    | 0.35        | <0.001 | 0.53        | <0.001 | -0.45         | <0.001 |

**Supplementary figure 2.** The weak-moderate correlation of serum G-17 with PG-I, PG-II, and PG-I/II ratio.
